# Supplementary material
Source: bioRxiv or medRxiv preprint supplement (https://www.biorxiv.org/highwire/filestream/22925/field_highwire_adjunct_files/0/082487-1.pdf)
Supplement: Supplementary file [file 082487-1.pdf]

# **Regulation of sleep plasticity by a thermo-sensitive circuit in *Drosophila***

Angelique Lamaze<sup>1</sup>, Arzu Öztürk-Çolak<sup>2</sup>, Robin Fischer<sup>3</sup>, Nicolai Peschel<sup>3</sup>,  
Kyunghee Koh<sup>2</sup> and James E.C. Jepson<sup>1\*</sup>

<sup>1</sup> UCL Institute of Neurology, London, UK

<sup>2</sup> Department of Neuroscience, the Farber Institute for Neurosciences, and Kimmel  
Cancer Center, Thomas Jefferson University, Philadelphia, USA

<sup>3</sup> Neurobiology and Genetics, Biocenter, University of Würzburg, Würzburg,  
Germany

## **SUPPLEMENTAL INFORMATION**

## FIGURE S1

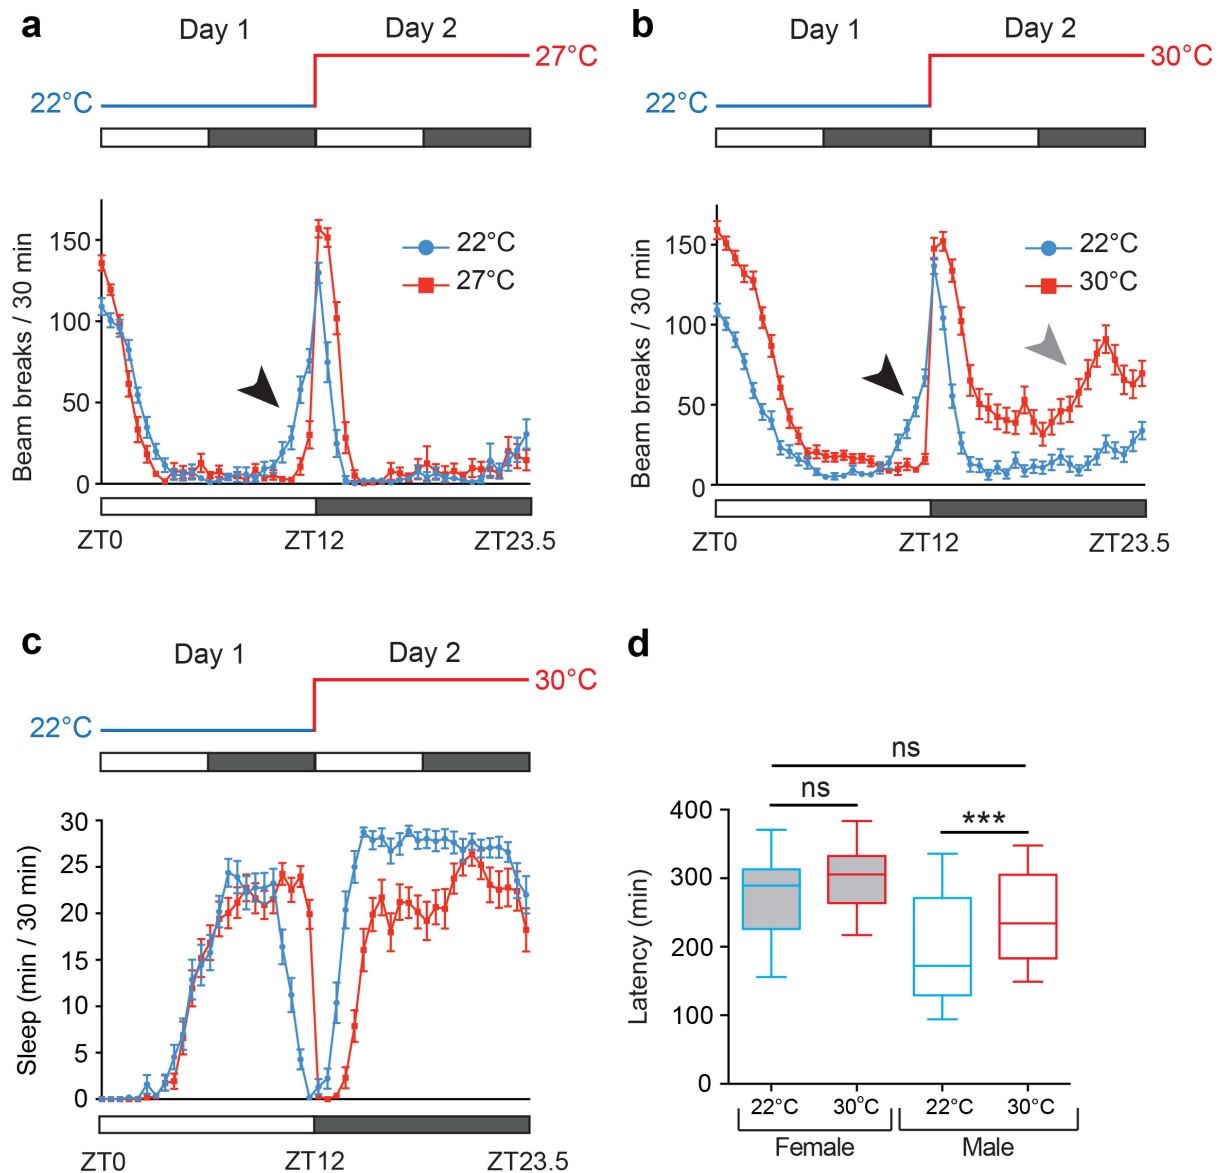

**Fig. S1: Alterations in locomotion and sleep architecture due to increased ambient temperature in *Drosophila* males and females.** (a) Average number of beam crossings per 30 min over 24 h for wild-type males shifted from 22°C to either 27°C (a) or 30°C (b). Black arrowheads indicate a delay in evening anticipation observed at either 27°C or 30°C relative to 22°C. Grey arrowhead denotes advanced morning anticipation observed at 30°C, but not at 27°C. (c) Average sleep patterns of adult mated female flies shifted from 22°C to 30°C. n = 32. (d) Latency to initiate

the first day sleep bout in adult males and females shifted from 22°C to 30°C. \*\*\* $p < 0.0005$ , ns –  $p > 0.05$ , Kruskal-Wallis test with Dunn's post-hoc test.

## FIGURE S2

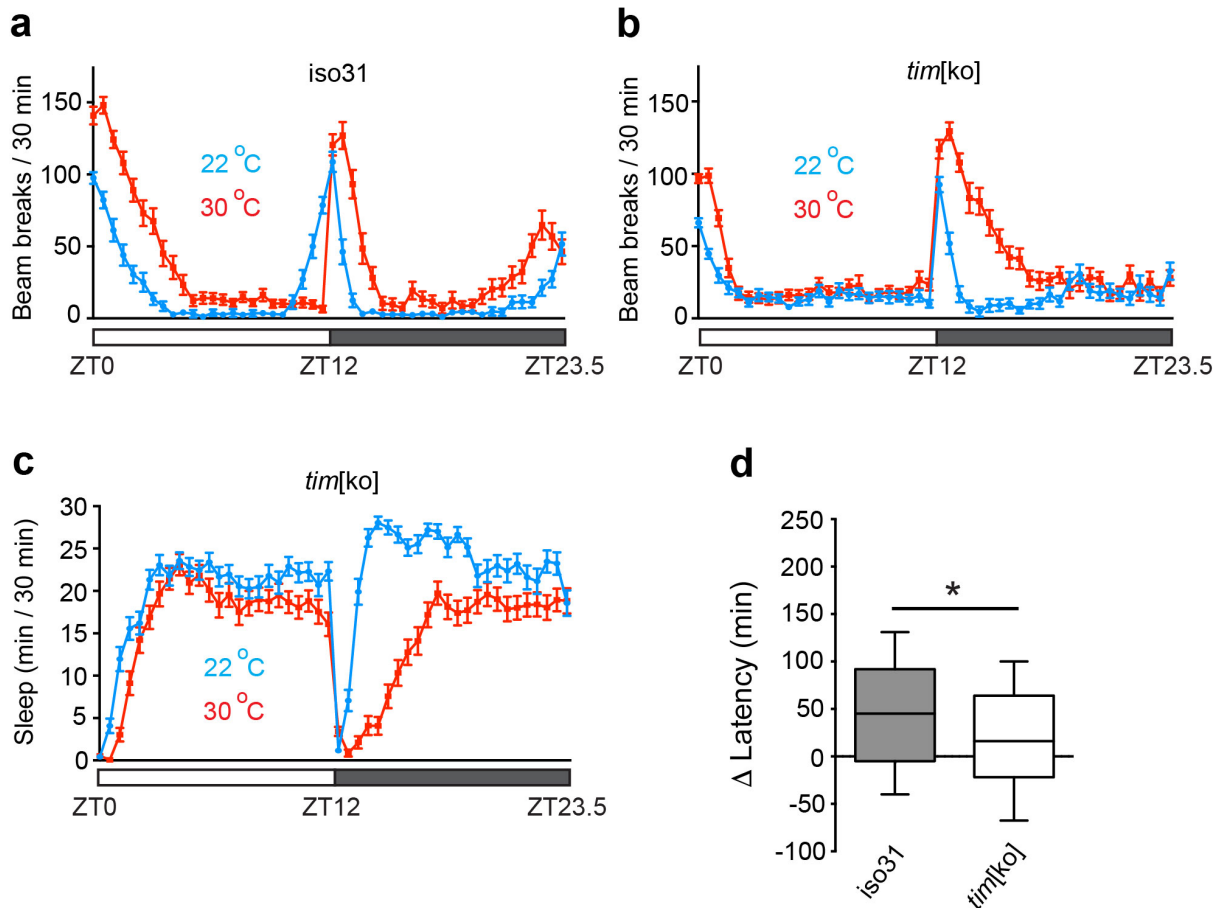

**Fig. S2: Locomotor and sleep patterns of *timeless* null flies during warm conditions.** (a-b) Number of beam breaks per 30 min in wild type *iso31* controls (n = 31) or *timeless* null (*tim*<sup>ko</sup>) homozygotes (n = 33) during consecutive days at either 22°C or 30°C. Locomotor activity was measured under 12 h light: 12 h dark conditions (white/grey bars) with Zeitgeber Times (ZT) shown below. Data are presented as mean  $\pm$  SEM for each time point. (c) Sleep patterns of *tim*<sup>ko</sup> homozygotes at either 22°C or 30°C. (d) Change in latency to the first day sleep

episode in iso31 controls (n = 69) or *timeless* null (*tim<sup>k0</sup>*) homozygotes (n = 64) following a shift from 22°C to 30°C. \*p < 0.05, Mann-Whitney U-test.

## Figure S3

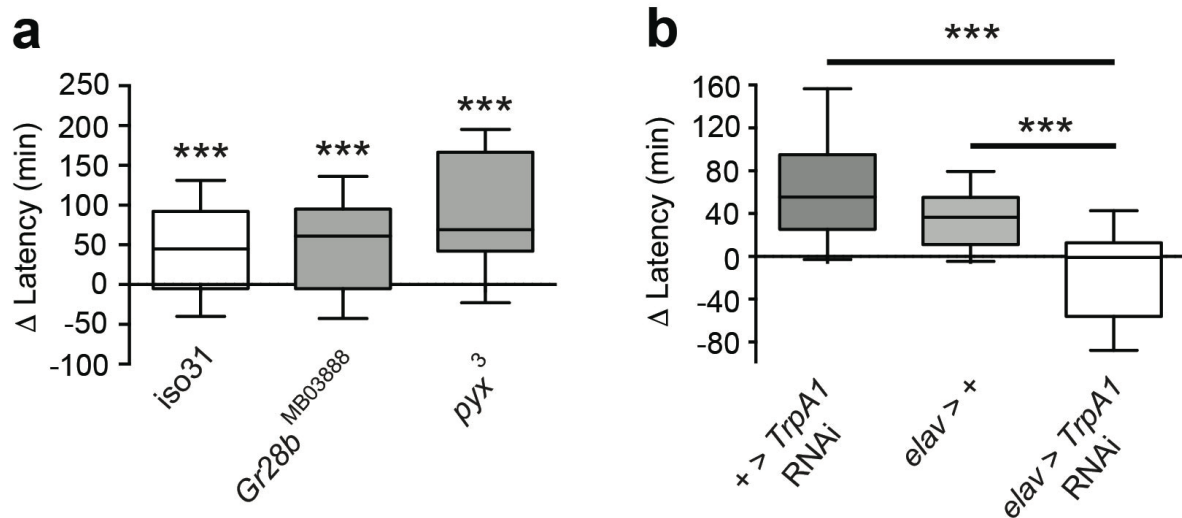

**Fig. S3: The Gr28b and Pyrexia thermo-receptors do not mediate PMW. (a)**

Change in latency to the first day sleep episode in iso31 controls (n = 69), *Gr28b<sup>MB03888</sup>* (n = 27) or *pyrexia<sup>3</sup>* (*pyx<sup>3</sup>*; n = 26) homozygotes following a shift from 22°C to 30°C. All genotypes show a significant increase in latency following an

increase in ambient temperature to 30°C. \*\*\*p < 0.0005, compared to a median of zero, Wilcoxon signed rank test. (b) Pan-neuronal knockdown of TrpA1 expressing

using a *UAS-TrpA1* RNAi transgene under control of *elav*-GAL4 suppresses PMW. n = 33-120. \*\*\*p < 0.0005, Kruskal-Wallis test with Dunn's post-hoc test.

FIGURE S4

a

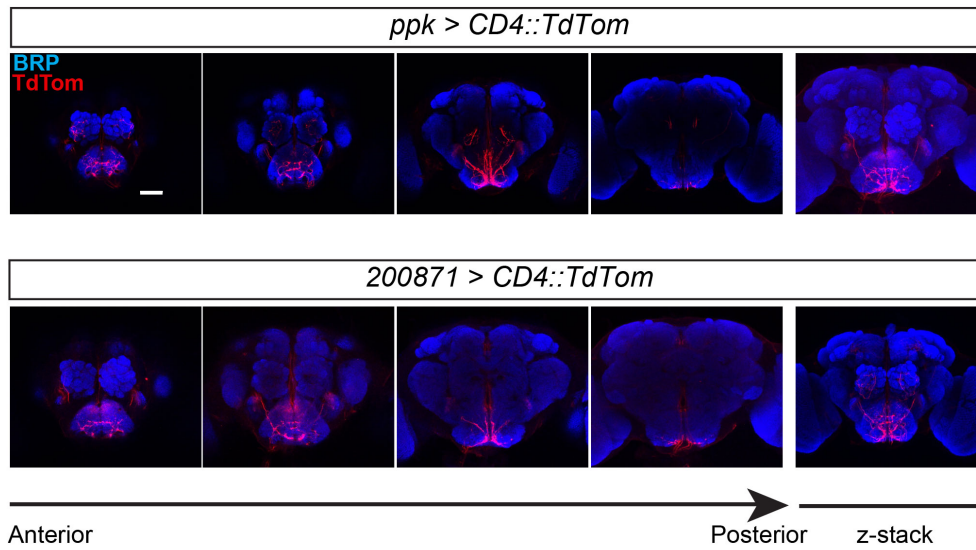

b

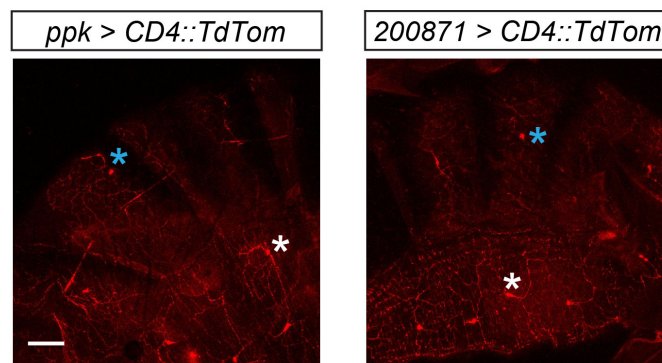

c

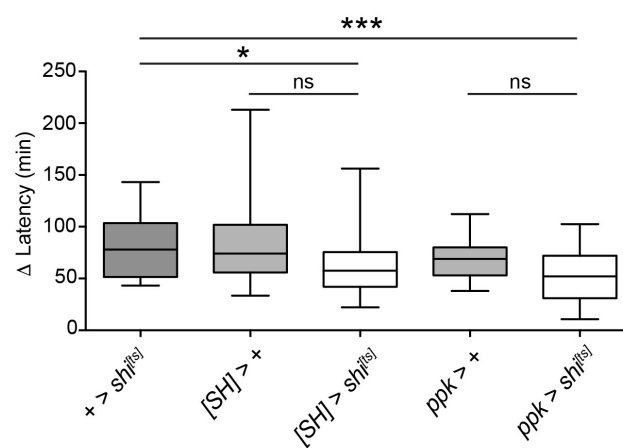

Fig. S4: *pickpocket*-expressing class IV multi-dendritic (mdIV) neurons do not mediate PMW. (a) Confocal slices showing expression patterns of *ppk*- and

*ppk*[200871]-GAL4 along the anterior/posterior axis of the adult brain. Right, z-stack projections. Neurons are labeled using a UAS-CD4::TdTom transgene (Red). Synaptic neuropil is labeled using an anti-Bruchpilot (BRP) antibody. Scale bar: 50  $\mu$ m. **(b)** Visualization of mdIV neurons on the adult body wall. White stars: v'ada neurons; blue stars: ddaC neurons. Scale bar: 100  $\mu$ m. **(c)** Acute inhibition of synaptic output (using UAS-*shi*<sup>ts</sup>) from *TrpA1*[SH]- and *ppk*-neurons does not suppress the delay in initiation of night sleep in response to increased ambient temperature. n = 24-77. \*p < 0.05, \*\*\*p < 0.0005, ns – p > 0.05, Kruskal-Wallis test with Dunn's post-hoc test.

## FIGURE S5

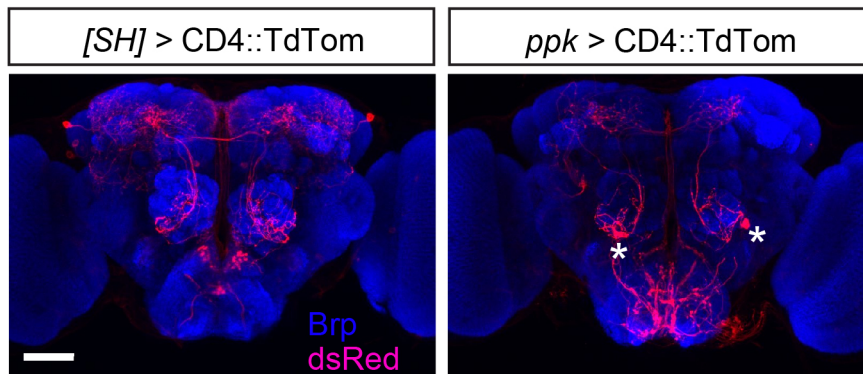

**Fig. S5: The *ppk*-GAL4 driver stochastically labels AC neurons in the adult *Drosophila* brain.** Confocal z-stacks showing *TrpA1*[SH]- and *ppk*-neurons labeled using UAS-CD4::TdTom. Synaptic neuropil is labeled using an anti-Bruchpilot (BRP) antibody. Scale bar: 50  $\mu$ m. Star: AC neuron cell bodies observed when labeling *ppk*-neurons.

## FIGURE S6

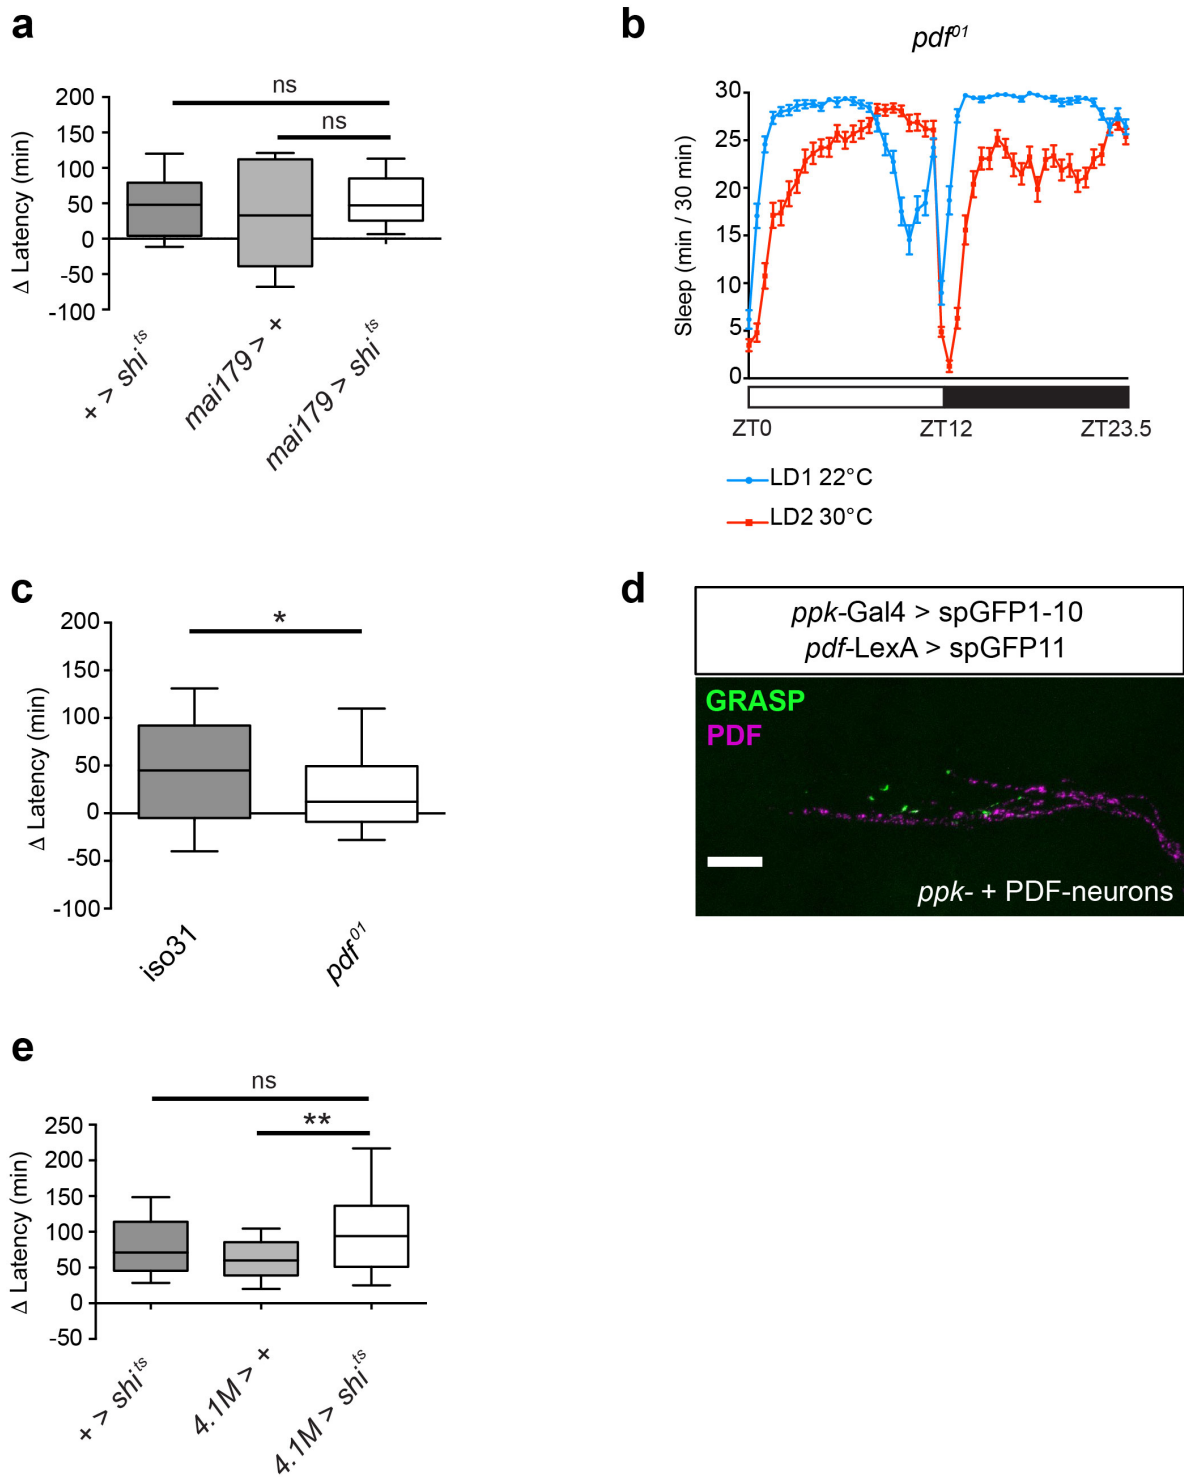

**Fig. S6: CRY-positive LN<sub>d</sub> and PDF neurons are not necessary for PMW. (a)**

Acute inhibition of synaptic output (using UAS-*shi<sup>ts</sup>*) from CRY-positive LN<sub>d</sub> neurons does not suppress the delay in initiation of night sleep in response to increased



ambient temperature. +>UAS-*shi*<sup>ts</sup> n=25, *mai179*>+ n=7, *mai179*>*shi*<sup>ts</sup> n=21. **(b)** Average sleep patterns of adult *pdf*<sup>01</sup> homozygote males shifted from 22°C to 30°C at ZT0. **(c)** Comparison of PMW between iso31 controls and *pdf*<sup>01</sup> homozygotes, Mann-Whitney test. iso31: n = 79, *pdf*<sup>01</sup>: n = 65. Iso31 p<0.0001, *pdf*<sup>01</sup> p=0.0007, Wilcoxon signed rank test. **(d)** GRASP between *pdf*- and *ppk*-neurons. Scale bar: 15 μm. **(e)** Change in latency to the first night sleep episode in *4.1m* > *shi*<sup>ts</sup> males and associated controls. n = 37-53. \*\*p < 0.0005, ns – p > 0.05, Kruskal-Wallis test with Dunn's post-hoc test.
